# Supplementary material
Source: publisher figshare collection journal article supplement (https://asha.figshare.com/ndownloader/files/33135899)
Supplement: Supplementary file 1 [file 33135899]

## Sheet: Sheet1
Supplemental material, Johnson & Hall, “A Scoping Review of Cognitive Assessment in Adults With Acute Traumatic Brain Injury,” AJSLP, https://doi.org/10.1044/2021_AJSLP-21-00132
Supplemental Material S2. Summary of review studies.
Study #	Authors	Study Title	Study Year	Country	Number of participants	TBI Severity Level of Participants	Neuroanatomical locations associated with acute TBI impacting cognition	What types of primary injuries are noted?	What types of secondary injuries are noted?	What cognitive domains are most affected after acute TBI?	What other comorbidities may impact cognition in the acute stage?	What are formal cognitive assessments used in the acute stages of injury?	What informal cognitive assessments are reported?	Did the study include SLPs? How?
1	Adam et al.	Clinical and imaging assessment of acute combat mild traumatic brain injury in Afghanistan	2015	USA	196	mild	white matter, superior longitudinal fasciculus	DAI	no details	alteration in consciousness, memory changes, processing speed, learning, visual spatial, reaction time	headache, dizziness, phonophobia, fatigue, behavioral changes, PTSD, sleep, depression	Rivermead Post-Concussion Symptoms Questionnaire, Post-Traumatic Stress Disorder Checklist Military, Beck Depression Inventory, Balance Error Scoring System, Automated Neuropsychological Assessment Metrics, Test of Memory Malingering	no details	no details
2	Arfanakis et al.	Diffusion tensor MR imaging in diffuse axonal injury	2002	USA	15	mild	white matter, corpus callosum, external capsule, internal capsule	DAI, inertial changes	no details	no details	no details	no details	no details	no details
3	Berisha et al.	Longitudinal changes in linguistic complexity among professional football players	2017	USA	28	all	no details	no details	no details	reduced linguistic complexity, discourse impairment, pragmatics, verbal fluency, memory, mood and behavioral changes	motor skills	no details	structured interviews (transcripts)	Conducted within CSD program
4	Chabok et al.	Effective factors on linguistic disorder during acute phase following traumatic brain injury in adults	2012	Iran	60	all	frontotemporal, frontal, temporal, parietal	contusion, ICH, SAH, SDH, EDH	no details	PTA, language, mental flexibility, verbal fluency, discourse	no details	Persian Aphasia Test, MMSE, GCS	no details	SLP conducted cognitive linguistic assessments
5	Coelho, Ylvisaker, & Turkstra	Nonstandardized assessment approaches for individuals with traumatic brain injuries	2005	USA	30	all	no details	no details	no details	discourse difficulties, language, response speed, pragmatics	fatigue, pain, medications, seizures, sensory problems, emotional changes, behavioral changes; communication partner difficulties	no details	discourse analysis dynamic assessments; structured interviews; observation; subtests from larger standardized batteries; contextualized hypothesis testing; communication checklists	yes - authors and geared towards SLPs
6	Coles et al.	Defining ischemic burden after traumatic brain injury using 15O PET imaging of cerebral physiology	2004	UK	22	moderate, severe	no details	metabolic changes, vascular changes, hypoperfusion	no details	no details	no details	no details	no details	no details
7	Cooper et al.	Factors influencing cognitive functioning following mild traumatic brain injury in OIF/OEF burn patients	2010	USA	194	mild	no details	no details	burn injuries	visuospatial, attention, processing speed, memory, language	psychological conditions, pain medications	RBANS	no details	no details
8	Covassin et al.	The role of age and sex in symptoms, neurocognitive performance, and postural stability in athletes after concussion	2012	USA	296	mild	no details	no details	no details	visual memory, verbal memory, reaction time	no details	ImPACT, Post-Concussion Symptom Scale, Balance Error Scoring System	no details	no details
9	Croall et al.	White matter correlates of cognitive dysfunction after mild traumatic brain injury	2014	UK	53	mild	white matter, corpus callosum	DAI, cytotoxic	cytotoxic changes, edema	verbal fluency, memory, PTA	no details	GCS, duration of PTA, Verbal Learning Test, National Adult Reading Test	no details	no details
10	Dall’Acqua et al.	Functional and structural network recovery after mild traumatic brain injury: A 1-year longitudinal study	2017	Switzerland	98	mild	limbic system, supplemental motor area, temporal	DAI, ICH	no details	working memory, attention, and verbal recall, executive functions	premorbid IQ, motivation	Rivermead Post-Concussion Symptoms Questionnaire (RPQ), GCS, Rey Auditory Verbal Learning Tests, Go/No-go Tasks	no details	no details
11	Daniell et al.	Changes in metabolism and caloric intake after sport concussion: A case series	2020	USA	10	mild	no details	no details	resting metabolic rate changes, decreased caloric intake	no details	drowsiness, feeling slowed down	Revised Head Injury Scale	no details	no details
12	DeGuise et al.	Prediction of outcome at discharge from acute care following traumatic brain injury	2006	Canada	339	all	frontal, temporal, temporo-parietal, parietal, occipital	EDH, SDH, IPH, skull fracture	no details	PTA	education level, location of neurological change, need for neurosurgical intervention	GCS, GOAT, FIM, GOS-E	no details	no details
13	DeMonte, Geffen, & Massavelli	The effects of post-traumatic amnesia on information processing following mild traumatic brain injury	2006	Australia	90	mild	no details	no details	no details	memory, information processing speed, PTA, verbal memory	excessive pain, stress or anxiety, fatigue, pain medication	word recall; Speed and Capacity of Language Processing, Digit Symbol Substitution Test; Rapid Screen of Concussion	no details	no details
14	DeSimoni et al.	Disconnection between the default mode network and medial temporal lobes in post-traumatic amnesia	2016	UK	19	all	hippocampus, parahippocampus	DAI	no details	memory, PTA, processing speed, spatial working memory	no details	CANTAB (computerized)	no details	no details
15	Downing, Bragge, & Ponsford	Cognitive rehabilitation following traumatic brain injury: A survey of current practice in Australia	2018	Australia	221	all	no details	no details	no details	PTA, attention, speed of processing, memory, communication, executive functions, visuospatial, lack of insight	mental health issues	neuropsychological assessment (unspecified), PTA assessment	no details	SLPs included as respondents to survey
16	Dreer et al.	Cognitive predictors of medical decision-making capacity in traumatic brain injury	2008	USA	54	moderate to severe	no details	no details	no details	PTA, verbal memory, verbal fluency, attention, reasoning, working memory, executive function	capacity to make decisions	GCS, GOAT, Capacity to Consent to Treatment Instrument, Token Test, Wechsler Adult Intelligence Scale - Revised Digit Span, WAIS-R Block Design, Trails A & B, Rey Auditory Verbal Learning Test, COWAT, Grooved Pegboard	no details	no details
17	Farace & Alves	Do women fare worse: A metaanalysis of gender differences in traumatic brain injury outcome	2000	USA	8	all	no details	no details	metabolism, sex hormones	PTA, verbal fluency, language, behavioral changes, pragmatics	headache, dizziness, sleep changes, mental health changes	no details	no details	no details
18	Feltrin et al.	Longitudinal changes in brain volumetry and cognitive functions after moderate to severe diffuse axonal injury	2018	Brazil	24	moderate and severe	white matter, corpus callosum, brainstem, frontal lobe, parietal lobe, temporal lobe, occipital lobe, insula, basal ganglia, cerebellum	DAI, vascular changes	cytoskeletal changes	slow processing speed, impairment in problem solving, attention, mental flexibility, memory, word retrieval	motor abilities	Trail Making Test A & B, Hopkins Verbal Learning Test (HVLT), GCS	no details	no details
19	Gauthier et al.	Acute prediction of outcome and cognitive-communication impairments following traumatic brain injury: The influence of age, education and site of lesion	2018	Canada	258	all	frontal lobe, parietal, temporal, occipital	no details	no details	language, discourse	length of stay, age, pre-morbid level of function, education level	GCS, GOS-E, Boston Naming Test (Short Form), Detroit Test of Learning Aptitude, Chapman-Cook-Speed of Reading Test, D-MEC, COWAT	discourse, subtests from Boston Diagnostic Aphasia Examination, subtests from SCATBI	no details
20	Ghawami et al.	Executive functioning of complicated-mild to moderate traumatic brain injury patients with frontal contusions	2017	Iran	9	mild to moderate	frontal lobe, prefrontal cortex	no details	no details	executive function	no details	TMT, Behavioural Assessment of Dysexecutive Syndrome, Delis-Kaplan Executive Function System	no details	no details
21	Hawley et al.	Traumatic brain injuries in older adults - 6 years of data for one UK trauma centre: Retrospective analysis of prospectively collected data	2017	UK	1389	all	no details	SDH, SAH, contusion, skull fracture	no details	no details	no details	GCS, Injury Severity Score, GOS-E	no details	no details
22	Hill et al.	Discourse and cognition in speakers with acquired brain injury (ABI): A systematic review	2018	Australia	25	all	frontal, temporal, temporo-parietal	no details	no details	discourse, language, executive function, memory, processing speed, disinhibition, attention, theory of mind	no details	Neurobehavioural Rating Scale—Revised, Montreal Cognitive Assessment, Functional Independence Measure—Cognitive component, Wisconsin Card Sorting Test, Delis–Kaplan Executive Function	no details	yes - article in CSD department
23	Hobson et al.	Determining client cognitive status following mild traumatic brain injury	2016	Australia	166	mild	no details	no details	no details	orientation, attention, language, memory, reasoning	multiple injuries, length of stay	GCS, Cognistat, Modified Barthel Index	no details	no details
24	Inoue et al.	Changes in cerebral blood flow from the acute to the chronic phase of severe head injury	2005	Japan	34	severe	decreased cerebral blood flow	reduction in cerebral metabolism, ischemia, hypoperfusion, SAH, DAI, SDH, EDH, ICH	ischemia, life threatening injury to organ other than brain (polytrauma)	no details	increased ICP	GCS, Disability Rating Scale	no details	no details
25	Johnson et al.	Factors influencing recovery from mild traumatic brain injury	2020	USA	49	mild	no details	EDH, SAH, IPH, SDH	no details	impulse control, memory, processing time, cognitive efficiency, reaction time	pain, medication, genetics	GCS, ImPACT, Post-Concussion Symptom Scale	no details	SLP conducting cognitive assessment
26	Johnston	The Galasko Report implemented: The role of emergency medicine in the management of head injuries	2006	UK	2281	all	frontal lobe, temporal, occipital	ICH, SDH, lacunar infarcts, contusion	seizure	change in arousal	vomiting, vertigo	GCS	no details	no details
27	Knollman-Porter et al.	Multidisciplinary management of collegiate sports-related concussions	2019	USA	1	mild	reduced cerebral blood flow	cytotoxic changes, blood vessel changes, white matter changes, inertial changes	biomarker changes, hypermetabolism	working verbal and visual memory, speed of information processing, impulse control, orientation, attention, and executive function; cognitive efficiency	headache, dizziness, sleep changes, mental health changes, emotional changes	Controlled Oral Word Association Test, Grooved Pegboard, Balance Error Scoring System, ImPACT, Postconcussion Rating Scale	self-reported symptom questionnaire; structured interview	yes - author and article targeted to SLP audience
28	Kushner & Johnson-Green	Changes in cognition and continence as predictors of rehabilitation outcomes in individuals with severe traumatic brain injury	2014	USA	9	severe	basal ganglia, frontal lobe, white matter, frontotemporal, temporal, parietal, brainstem	SDH, SAH, edema, DAI, contusions, skull fracture,	no details	language, memory, problem solving, attention	pain, motor issues	GCS, length of PTA, FIM	no details	no details
29	Larres et al.	The natural history of acute recovery of blast-induced mild traumatic brain injury: A case series during war	2016	USA	15	mild	no details	inertial changes, blast induced; cytotoxic changes, reduced cerebral blood flow, and altered metabolism within the brain	polytrauma, neurometabolic cascade	alteration in consciousness, memory changes	balance changes, motoric injuries, psychological factors (anxiety, depression, PTSD), sensory changes	GCS, Graded Symptom Checklist, Balance Error Scoring System	structured interview	no details
30	LeBlanc et al.	Acute evaluation of conversational discourse skills in traumatic brain injury	2014	Canada	195	all	no details	no details	no details	memory, mental flexibility, language, reasoning, discourse	no details	MoCA, DRS, GOS-E, D-MEC, Wechsler Memory Scale 3rd Ed Digit Span, TMT A & B, Hopkins Verbal Learning Test, Boston Naming Test - short form, COWAT	length of stay	no details
31	Lee et al.	The relations among depression, cognition, and brain volume in professional boxers: A preliminary examination using brief clinical measures	2019	USA	205	mild	insula, orbitofrontal, corpus callosum, thalamus, limbic system	no details	no details	no details	depression	no details	battery of computerized tests, patient health questionnaire, structured interview	no details
32	Lippa et al.	Effort in acute traumatic brain injury: Considering more than pass/fail	2014	USA	44	moderate or severe	no details	no details	no details	PTA	effort, motivation, education, severity of injury	RBANS, GOAT	no details	no details
33	Mayer et al.	A prospective diffusion tensor imaging study in mild traumatic brain injury	2010	USA	22	mild	DAI, frontal, parietal, medial temporal lobes, corpus callosum, internal capsule	DAI	neurotransmitter changes	attention, memory, working memory, executive function, processing speed	no details	Test of Memory Malingering, Wechsler Test of Adult Reading, Post-Concussion Symptom Checklist	structure interview	no details
34	McCrea et al.	Day of injury cognitive performance on the military acute concussion evaluation (MACE) by U.S. military service members in OEF/OIF	2014	USA	179	mild	no details	no details	no details	orientation, memory, attention	no details	GCS, Military Acute Concussion Evaluation	no details	no details
35	McGlade, Rogowska, & Yurgelum-Todd	Sex differences in orbitofrontal connectivity in male and female veterans with TBI	2015	USA	41	all	orbitofrontal cortex, white matter connections, prefrontal cortex, cerebellum, parietal lobe, temporal lobe, insula	DAI	hormones	no details	aggression, PTSD	The Ohio State University TBI Identification Method, Hamilton Depression Rating Scale, Profile Mood States	structured interview	no details
36	McLafferty et al.	Predictors of improved functional outcome following inpatient rehabilitation for patients with traumatic brain injury	2016	USA	184	moderate to severe	no details	no details	no details	communication	mobility, length of stay	GCS, Abbreviated Injury Severity Scale, FIM	no details	no details
37	McMahon et al.	Symptomatology and functional outcome in mild traumatic brain injury: Results from the prospective TRACK-TBI study	2014	USA	375	mild	no details	no details	no details	alteration in consciousness, memory	psychological changes, sleep changes, emotional changes	GCS, Post Concussion Syndrome survey	no details	no details
38	Miles et al.	Short-term DTI predictors of cognitive dysfunction in mild traumatic brain injury	2008	USA	46	mild	white matter, corpus callosum, internal capsule	DAI	no details	mental flexibility, response speed, memory, attention, executive function	no details	Weinberg Visual Cancellation Test, Rusk Institute of Rehabilitation Medicine Similarities, Stroop Task, Controlled Oral Word Association Test, Trail Making Test A & B; Headminder Cognitive Stability Index (computerized)	no details	no details
39	MRC CRASH Trial Collaborators	Predicting outcome after traumatic brain injury: Practical prognostic models based on large cohort of international patients	2008	UK	8509	all	no details	IPH, SAH, contusion	pupil reactivity	no details	no details	GCS, GOS-E	no details	no details
40	Munivenkatappa et al.	Traumatic brain injury: Does gender influence outcomes?	2016	India	1627	all	no details	IPH, EDH, SDH, SAH, edema, IVH, skull fracture	hormones, age	PTA	no details	GCS	no details	no details
41	Nakase-Richardson et al.	Utility of post-traumatic amnesia in predicting 1-year productivity following traumatic brain injury: Comparison of the Russell and Mississippi PTA classification intervals	2011	USA	3846	all	no details	no details	no details	PTA	age at injury	GOAT, O-log, DRS, GCS, FIM	no details	study utilized some rehab units
42	Nakase-Thompson et al.	Acute confusion following traumatic brain injury	2004	USA	85	all	no details	no details	no details	PTA, delirium, orientation, memory	time since injury, perceptual disturbances, sleep-wake cycle; psychological changes, medications	GCS, GOAT, Delirium Rating Scale, Cognitive Test for Delirium, Agitated Behaviour Scale	no details	no details
43	Niogi & Mukherjee	Diffusion tensor imaging of mild traumatic brain injury	2010	USA	23	mild	DAI, frontal and temporal white matter pathways, anterior corona radiata, uncinate fasciculus, superior longitudinal fasciculus, anterior corpus callosum, internal capsule, prefrontal cortex, thalamus	DAI	no details	executive functions, slower processing speed, attention, memory, new learning, PTA	no details	no details	no details	no details
44	Oehr & Anderson	Diffusion-tensor imaging findings and cognitive function following hospitalized mixed-mechanism mild traumatic brain injury: A systematic review and meta-analysis	2017	Australia	8	mild	white matter	DAI	no details	attention, memory and executive function, processing speed, working memory, language	no details	Wechsler Adult Intelligence Scale - Digit Span Subtest; Trail Making Test - A and B; California Verbal Learning Test; Rey Complex Figure Test; Stroop Task; Controlled Oral Word Association Test; Paced Auditory Serial Addition Task; Wisconsin Card Sort Test	no details	no details
45	Oertel et al.	Posttraumatic vasospasm: The epidemiology, severity, and time course of an underestimated phenomenon: A prospective study performed in 299 patients	2005	USA	299	all	middle cerebral arteries, basilar arteries	ischemic changes	cerebral blood flow, vasospasm	no details	no details	GCS	no details	no details
46	Oh & Seo	Functional and cognitive recovery of patients with traumatic brain injury	2009	South Korea	83	all	no details	ICH, SDH, EDH, SAH, IVH	pupil reactivity, motor response	no details	no details	GCS, DRS, FIM, Ranchos	no details	no details
47	O'Keeffe et al.	Dynamic blood-brain barrier regulation in mild traumatic brain injury	2020	Ireland	5	mild	BBB	BBB, inertial forces	biomarker changes	alteration in consciousness	no details	no details	no details	no details
48	Ponsford et al.	INCOG recommendations for management of cognition following traumatic brain injury, part II: Attention and information processing speed	2014	Australia	n/a	all	prefrontal cortex, parietal lobes, thalamus, parieto-temporo-occipital areas, limbic structures, frontal lobes, basal ganglia, white matter	DAI	neurotransmitter changes	attention, arousal, processing speed, working memory, metacognition	fatigue, anxiety, sleep disturbances, pain, medication, apathy	PASAT, Rating Scale of Attentional Behavior, Moss Attention Rating Scale, Trail Making Test, line cancellation, Digit Span	structured interview	SLP as part of rehab team
49	Ponsford et al.	INCOG recommendations for management of cognition following traumatic brain injury, part I: Posttraumatic amnesia/delirium	2014	Australia	n/a	all	frontotemporal, white matter	ICH, skull fracture, increased ICP	no details	PTA, retrograde and anterograde amnesia, poor attention, executive function, information processing speed, simple reaction time, language	agitation, sleep changes, medications	Galveston Orientation and Amnesia Test, Westmead PTA Scale, O-Log	no details	SLP as part of rehab team
50	Rodriguez-Baeza et al.	Morphological features in human cortical brain microvessels after head injury: A three-dimensional and immunocytochemical study	2003	Spain	10	severe	temporal, parietal, occipital lobes; white matter; frontotemporal	cerebral ischemia, SDH, ICP increase, DAI, SAH, edema, inertial changes	integrity of the BBB	no details	no details	GCS	no details	no details
51	Rothling et al.	A meta-analysis of neuropsychological outcome after mild traumatic brain injury: Re-analyses and reconsiderations of Binder et al. (1997), Frencham et al. (2005), and Pertab et al. (2009)	2011	USA	25	mild	no details	no details	no details	PTA, verbal memory, working memory, executive functioning, processing speed, reasoning, language	no details	no details	no details	no details
52	Schumacher et al.	Predictors of inpatient (neuro)rehabilitation after acute care of severe traumatic brain injury: An epidemiological study	2016	Switzerland	566	severe	no details	no details	pupil reaction	no details	age, gender, multiple injuries	GCS, ISS	no details	no details
53	Sherer, Yablon, & Nakase-Richardson	Patterns of recovery of posttraumatic confusion state in neurorehabilitation admissions after traumatic brain injury	2009	USA	107	all	no details	no details	no details	PTA, attention, memory, language, vigilance	agitation, sleep disturbance, daytime decreased arousal, psychotic-type symptoms	GCS, Confusion Assessment Protocol, Disability Rating Scale, GOAT	no details	no details
54	Shores et al.	The diagnostic accuracy of the Revised Westmead PTA Scale as an adjunct to the Glasgow Coma Scale in the early identification of cognitive impairment in patients with mild traumatic brain injury	2007	Australia	82	mild	no details	no details	no details	PTA, verbal memory, memory, reaction time, motor speed, impulse control	no details	GCS, Revised - Westmead Post-traumatic Amnesia Scale, ImPACT, Concussion Symptoms Checklist, Westmead Selective Reminding Test, GOAT	symptoms questionnaire	no details
55	Shumskaya et al.	Abnormal whole-brain functional networks in homogenous acute mild traumatic brain injury	2012	Netherlands	35	mild	motor network, frontoparietal network, corpus callosum	IPH, SDH, EDH, contusions	no details	information processing speed, attention	motor speed, cognitive fatigue, headache, noise and light sensitivity, emotional distress, fatigue	GCS, GOS-E, Injury Severity Score, length of PTA, Finger Tapping Test, Stroop Task, TOMM, Rivermead Post-Concussion Questionnaire, Beck Depression Inventory	symptoms questionnaire	no details
56	Smith et al.	The neuroinflammatory response in humans after traumatic brain injury	2014	UK	26	all	DAI	cellular changes, inflammation	neurotransmitter changes	cognitive efficiency	no details	GCS	no details	no details
57	Smith & Meaney	Axonal damage in traumatic brain injury	2000	USA	57	all	white matter, corpus callosum, basal ganglia, brainstem	IPH, SDH, inertial changes	metabolic change	no details	no details	no details	no details	no details
58	Steel et al.	Speech pathologists' current practice with cognitive-communication assessment during post-traumatic amnesia: A survey	2013	Australia	45	all	no details	no details	no details	PTA	awareness, alertness, agitation, ability to participate, motivation, severity of medical injury, discharge needs	Westmead PTA, Boston Naming Test, Brief Test of Head Injury, COWAT, CADL, ABCD, SCATBI, WAB, JFK Coma Recovery Scale, TLC-E, Pyramids and Palm Trees	observation, conversational discourse, subtests from standardized tests	Yes - authors and surveyed SLPs
59	Steel et al.	Speech-language pathologists' perspectives on cognitive communication assessment during post-traumatic amnesia	2016	Australia	10	all	no details	no details	no details	PTA, communication, attention, memory	fatigue	Westmead PTA Scale, WHIM, WNSSP; Mt. Wilga High Level Language Test; CLQT; Mississippi Aphasia Screening Test	structured interview; observation; discourse analysis; hypothesis testing; using standardized subtests in a nonstandardized way	Yes - respondents to the survey were SLPs
60	Susman et al.	Traumatic brain injury in the elderly: Increased mortality and worse functional outcome at discharge despite lower injury severity	2002	USA	11722	all	no details	no details	no details	language	motor skills, feeding abilities	GCS, ISS, FIM	no details	no details
61	Sveen et al.	Relationships between competency in activities, injury severity, and post-concussion symptoms after traumatic brain injury	2010	Norway	63	all	no details	no details	no details	PTA, emotional competency, attention	headache, fatigue, sensory disturbances, sleep issues, age, alcohol addiction	GCS, ISS, Rivermead Post Concussion	structured interview	no details
62	Tate et al.	A systematic review of assessment tools for adults used in traumatic brain injury research and their relationship to ICF	2013	Australia	2593	all	no details	no details	no details	consciousness, orientation, PTA, attention, memory, language	sleep, emotion, motivation	GCS, CRS-Revised, GOAT, PASAT, Test of Everyday Attention, Boston Naming Test, Trail Making Test, MMSE	no detail	no details
63	Tate et al.	INCOG recommendations for management of cognition following traumatic brain injury, part III: executive function and self-awareness	2014	Australia	n/a	all	frontal lobes, prefrontal, white matter connections, temporal lobes	no details	no details	executive function, insight, metacognition	awareness, motivation	standardized tests appropriate to patient	structured interview, behavioral observation, symptom questionnaire	Yes - authors and SLP to help with executive function impairment
64	Tate et al.	Predicting duration of posttraumatic amnesia (PTA) from early PTA measurements	2001	Australia	86	all	no details	no details	no details	PTA	stage of recovery	GCS, Modified Oxford PTA Scale, GOAT	no details	no details
65	Tate et al.	A multicentre, randomised trial examining the effect of test procedures measuring emergence from posttraumatic amnesia	2006	Australia	82	all	no details	no details	no details	PTA, orientation, memory	no details	Westmead PTA Scale, Modified Oxford PTA Scale, GOAT, MMSE, Random Letter Test, Simple Reaction Time from California Computerized Assessment Package, Test of Memory and Learning, Agitated Behavior Scale	no details	no details
66	Togher et al.	INCOG recommendations for management of cognition following traumatic brain injury, Part IV: Cognitive communication	2014	Australia	n/a	all	no details	no details	no details	cognitive communication	communication partner, environment, fatigue, communication priorities, personal factors, culture, literacy	no details	no details	Yes - authors and SLP for intervention for people with cognitive communication impairments
67	Turkstra et al.	Practice guidelines for standardized assessment for persons with traumatic brain injury	2005	USA	31	all	no details	no details	no details	cognitive communication	no details	ASHA-FACS; BRIEF; CADL-2; FIM; RBANS; WAB; Test of Language Competence - Extended	structured interview	Yes- Authors and SLPs surveyed and articles written for SLP audience
68	Veksler et al.	Slow blood-to-brain transport underlies enduring barrier dysfunction in American football players	2020	Israel	146	all	BBB, white matter, midbrain peduncles, basal ganglia, temporal cortex	BBB changes	biomarker changes	no details	no details	no details	no details	no details
69	Velikonja et al.	INCOG recommendations for management of cognition following traumatic brain injury, Part V: Memory	2014	Canada	n/a	all	no details	no details	no details	memory	injury-related comorbidities	no details	no details	SLP as part of rehab team
70	Vukovic, Vuksanovic, & Vukovic	Comparison of the recovery patterns of language and cognitive functions in patients with post-traumatic language processing deficits and in patients with aphasia following a stroke	2008	Serbia	71	all	temporal, parietal, occipital, frontal lobes, white matter	contusion	no details	language, executive functions, visuospatial, attention, memory	no details	BDAE, Raven Progressive Matrices Test, Rey Auditory-Verbal Learning Test, Rey-Osterrieth Complex Figure	no details	no details
71	Weir et al.	Objective and behavioural assessment of the emergence from post-traumatic amnesia (PTA)	2006	Australia	69	all	no details	no details	no details	PTA, attention, memory, new learning	agitation, aggression, self-care issues, behavioral changes	Westmead PTA, Oxford PTA, Behavioural Rating Scale, GCS	no details	no details
72	Wilcox et al.	Cognitive dysfunction in ICU patients: Risk factors, predictors, and rehabilitation interventions	2013	Canada	34	all	frontal lobes, hippocampus, white matter	no details	neurotransmitter changes, metabolic changes	memory, attention , executive function, processing speed, visuospatial	depression, critical illness, preexisting cognitive impairment, mobilization issues, medications, sleep, genetics	no details	no details	no details
73	Wright & Schmitter-Edgecombe	The impact of verbal memory encoding and consolidation deficits during recovery from moderate-to-severe traumatic brain injury	2011	USA	23	moderate to severe	prefrontal cortex, medial temporal lobe; hippocampus	DAI; inertial changes	no details	PTA; verbal memory impairment; encoding memory, consolidating memory	no details	GCS; Rey Auditory Verbal Learning Test; Item Specific Deficit Approach	no details	no details
74	Wu et al.	Longitudinal white-matter abnormalities in sports-related concussion	2020	USA	219	mild	white matter, corpus callosum	DAI; inertial changes	no details	no details	depression, somatization changes, balance, anxiety	Standardized Assessment of Concussion, Sports Concussion Assessment Tool, Balance Error Scoring System, Brief Symptom Inventory, Wechsler Testing of Adult Reading Test	no details	no details
75	Xydakis et al.	Olfactory impairment and traumatic brain injury in blast-injured combat troops	2015	USA	231	all	frontal lobe, parietal, temporal, occipital	ICH, skull fracture, increased ICP	olfactory dysfunction	no details	no details	no details	no details	no details
